# Supplementary material for: Perovskite photovoltaics: life-cycle assessment of energy and environmental impacts
Source: Royal Society of Chemistry journal article supplement (doi:10.1039/c5ee00615e), 2015-01-01
Supplement: c5ee00615e1.pdf [file c5ee00615e1.pdf]

Supplementary Information

# Perovskite Photovoltaics: Life-Cycle Assessment of Energy and Environmental Impacts

Jian Gong,<sup>a</sup> Seth B. Darling<sup>b,c</sup> and Fengqi You<sup>a\*</sup>

<sup>a</sup> Northwestern University, Department of Chemical and Biological Engineering, 2145 Sheridan Road, Evanston, IL, 60208, USA

<sup>b</sup> Argonne National Laboratory, Center for Nanoscale Materials, 9700 South Cass Avenue, Argonne, IL, 60439, USA

<sup>c</sup> University of Chicago, Institute for Molecular Engineering, 5801 South Ellis Avenue, Chicago, IL, 60637, USA

---

\* To whom all correspondence should be addressed. Phone: (847) 467-2943; Fax: (847) 491-3728; E-mail: you@northwestern.edu

This Supplementary Information file includes: (1) life cycle inventory analyses for nine constituents used in manufacturing the TiO<sub>2</sub> and ZnO perovskite solar modules, namely, PbI<sub>2</sub>, CH<sub>3</sub>NH<sub>3</sub>I, spiro-OMeTAD, FTO glass, ITO glass, BL-TiO<sub>2</sub> ink, nc-TiO<sub>2</sub> ink, ZnO ink, and silver paste; (2) all life cycle impact assessment data from Ecoinvent database; (3) uncertainty analysis and sensitivity analysis for the energy payback time (EPBT) and the CO<sub>2</sub> emissions factor of the ZnO module.

## **1. Life cycle inventory analysis for unavailable raw materials**

### **1.1 PbI<sub>2</sub>**

The manufacturing route for PbI<sub>2</sub> is shown in Figure S1. The process for manufacturing potassium iodide is derived based on a commercial process.<sup>1</sup> The lead nitrate production is based on the description of Carr.<sup>2</sup> The life cycle inventory and the corresponding life cycle impact assessment of 1 kg PbI<sub>2</sub> is shown in Table S1 and Table S2. In order to get the life cycle impact assessment results, the mass of the co-products is used to allocate the environmental impacts of the manufacturing process. Waste is treated with an incineration method. Note that water input and out is not listed in the inventory, but the corresponding heat consumption for distilled water is considered in the cumulative energy consumption.

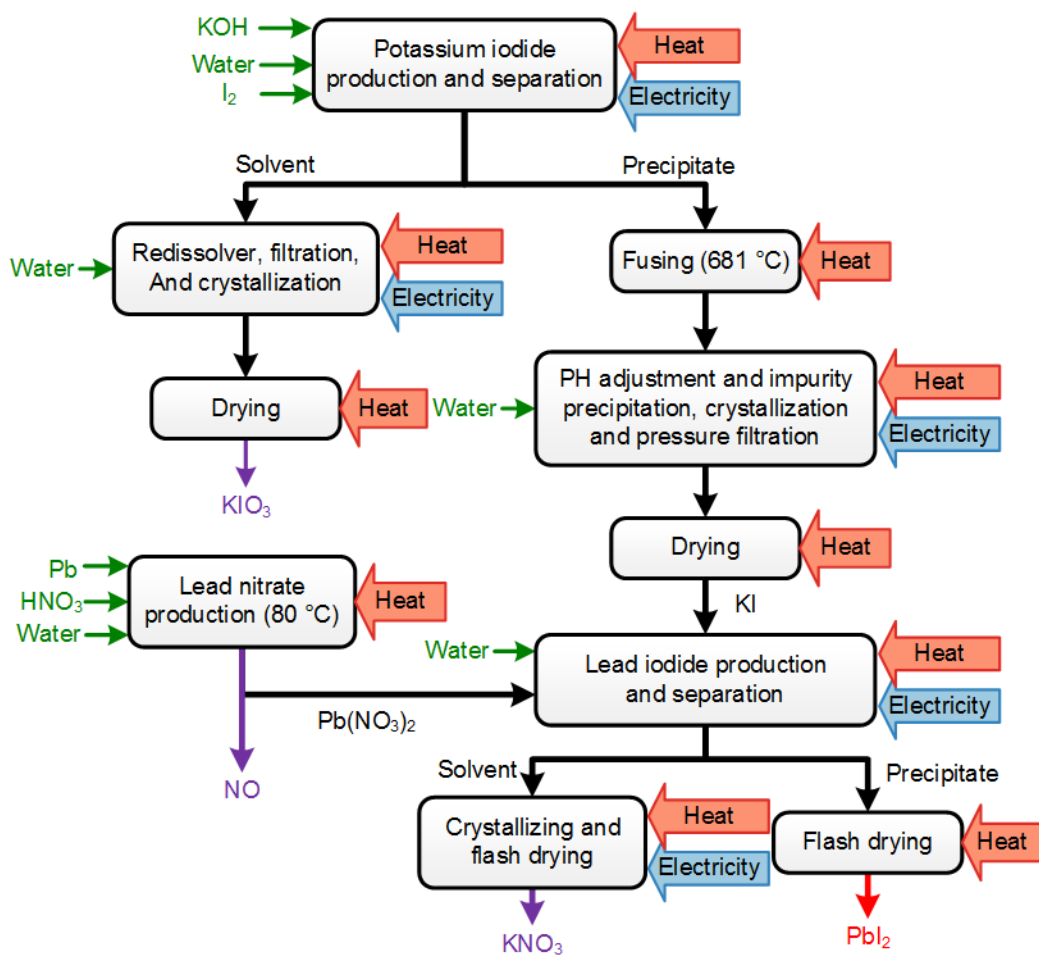

Figure S1. Manufacturing route for  $PbI_2$ . Green flows represent feed materials, black flows represent intermediate products, purple flows represent co-products, the red flow represents major product. The numbers in the red and blue arrows are the heat and electricity consumption in MJ of the corresponding unit processes in order to produce one kg of the major product.

Table S1. Material and energy inventory of a PbI<sub>2</sub> manufacturing process

|                                              | Value  | Unit |
|----------------------------------------------|--------|------|
| Process input                                |        |      |
| Iodine (I <sub>2</sub> )                     | 0.670  | kg   |
| Potassium hydroxide (KOH)                    | 0.291  | kg   |
| Lead (Pb)                                    | 0.449  | kg   |
| Nitric acid (HNO <sub>3</sub> ) <sup>a</sup> | 0.729  | kg   |
| Cumulative heat consumption                  | 13.5   | MJ   |
| Cumulative electricity consumption           | 0.133  | kWh  |
| Products                                     |        |      |
| Lead iodide (PbI <sub>2</sub> )              | 1.00   | kg   |
| Potassium nitrate (KNO <sub>3</sub> )        | 0.438  | kg   |
| Potassium iodate (KIO <sub>3</sub> )         | 0.135  | kg   |
| Nitric oxide (NO)                            | 0.0434 | kg   |
| waste                                        | 0.160  | kg   |

a. Commercially available nitric acid of 50 wt% is used.

Table S2. Life cycle impact assessment results for 1 kg PbI<sub>2</sub>

| Impact categories/ Endpoint indicators       | Values   | Units                  |
|----------------------------------------------|----------|------------------------|
| Acidification potential                      | 3.44E-02 | kg SO <sub>2</sub> -Eq |
| Eutrophication potential                     | 9.83E-03 | kg PO <sub>4</sub> -Eq |
| Freshwater aquatic ecotoxicity (FAETP 100a)  | 1.42E+00 | kg 1,4-DCB-Eq          |
| Freshwater sediment ecotoxicity (FSETP 100a) | 2.99E+00 | kg 1,4-DCB-Eq          |
| Human toxicity (HTP 100a)                    | 1.23E+00 | kg 1,4-DCB-Eq          |
| Ionising radiation                           | 1.04E-08 | DALYs                  |
| Land use                                     | 5.60E-01 | m <sup>2</sup> a       |
| Malodours air                                | 3.79E+04 | m <sup>3</sup> air     |
| Marine aquatic ecotoxicity (MAETP 100a)      | 5.23E+00 | kg 1,4-DCB-Eq          |
| Marine sediment ecotoxicity (MSETP 100a)     | 5.50E+00 | kg 1,4-DCB-Eq          |
| Photochemical oxidation (EBIR)               | 9.14E-04 | kg formed ozone        |
| Depletion of abiotic resources               | 4.90E-02 | kg antimony-Eq         |
| Stratospheric ozone depletion (ODP 10a)      | 5.71E-07 | kg CFC-11-Eq           |
| Terrestrial ecotoxicity (TAETP 100a)         | 1.23E-03 | kg 1,4-DCB-Eq          |
| Cumulative energy demand                     | 6.56E+01 | MJ-Eq                  |
| Climate change (IPCC 2013)                   | 3.80E+00 | kg CO <sub>2</sub> -Eq |
| Eco-indicator 99 (ecosystem quality)         | 9.01E-02 | points                 |
| Eco-indicator 99 (human health)              | 3.09E-01 | points                 |
| Eco-indicator 99 (resources)                 | 4.25E-01 | points                 |

The first step to manufacture PbI<sub>2</sub> in Figure S1 is shown in Figure S2, and we use this step as an example to elaborate how the inventory analysis is performed. This step involves a chemical reaction shown in (S1). The input materials are potassium hydroxide (KOH), water, and iodine (I<sub>2</sub>), while the output consists of a precipitate product and a solvent product. The precipitate product is primarily made of potassium iodate (KIO<sub>3</sub>), and the minor constituents include water and solid waste. In contrast, the solvent product is made of potassium iodide (KI), dissolvable

waste, and water. The process consumes heat to generate distilled water and electricity to perform separations.

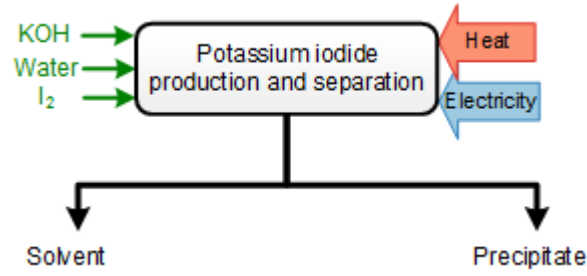

Figure S2. The first step to manufacture PbI<sub>2</sub>.

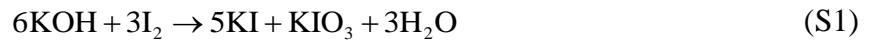

$$M_{\text{I}_2} = M_{\text{I}_2\text{-impure}} + M_{\text{I}_2\text{-pure}} \quad (\text{S2})$$

$$M_{\text{I}_2\text{-impure}} = \text{con}_{\text{I}_2\text{-KI}} \cdot M_{\text{KI}} \quad (\text{S3})$$

$$M_{\text{I}_2\text{-pure}} = sc_{\text{I}_2\text{-KI}} \cdot M_{\text{KI}} \quad (\text{S4})$$

$$M_{\text{KOH}} = sc_{\text{KOH-KI}} \cdot M_{\text{KI}} \quad (\text{S5})$$

$$M_{\text{water}} = \alpha \cdot sol_{\text{KOH}} \cdot M_{\text{KOH}} \quad (\text{S6})$$

$$M_{\text{KIO}_3} = sc_{\text{KIO}_3\text{-KI}} \cdot M_{\text{KI}} - sol_{\text{KIO}_3} \cdot (M_{\text{water}} + sc_{\text{water}} \cdot M_{\text{KI}}) \quad (\text{S7})$$

The mass and energy in the inventory is evaluated by Equations (S2)-(S9). The mass of KI is set as 1 kg. In Equation (S2), the mass of raw material I<sub>2</sub> is the sum of the mass of the impurities and pure I<sub>2</sub>. According to the U.S. Environmental Protection Agency,<sup>1</sup> the impurities from raw iodine amount to 15 kg/kg ( $con_{\text{I}_2\text{-KI}}$ ) of the KI product in (S3). The mass of the pure I<sub>2</sub> and KOH are calculated based on the stoichiometric relationship ( $sc_{\text{I}_2\text{-KI}}$  and  $sc_{\text{KOH-KI}}$ ) in (S4) and (S5), respectively. The mass of water in (S6) is based on the solubility of KOH at 20 °C, which is 1.12 g KOH/g water ( $sol_{\text{KOH}}$ ).  $\alpha=2$  is a coefficient to ensure that all the KI is dissolved in the solvent product. In Equation (S7), the mass of KIO<sub>3</sub> in the precipitate product equals the stoichiometric mass ( $sc_{\text{KIO}_3\text{-KI}}$ ) of KIO<sub>3</sub> minus the dissolved KIO<sub>3</sub> ( $sol_{\text{KIO}_3}$ ). The solid waste comes from the impurities, while the water content is twice the volume of the precipitate.<sup>3</sup> The remaining products are left in the solvent. Additionally, the heat and electricity consumption are determined by Equations (S8) and (S9), respectively.  $\Delta h_{\text{water}}$  represents the heat of vaporization of water, while  $uc_{\text{filter}} = 0.21 \text{ MJ/kg solid}$  is the unit electricity consumption of a pressure filter.<sup>3</sup>

$$E_{\text{heat}} = \Delta h_{\text{water}} \cdot M_{\text{water}} \quad (\text{S8})$$

$$E_{\text{electricity}} = uc_{\text{filter}} \cdot M_{\text{KIO}_3} \quad (\text{S9})$$

The inventory of this step is shown in Table S3.

Table S3. Mass and energy inventory of the first step to in the PbI<sub>2</sub> manufacturing process

|                      |                           | Values | Units |
|----------------------|---------------------------|--------|-------|
| <b>Process input</b> |                           |        |       |
|                      | Iodine (I <sub>2</sub> )  | 0.933  | kg    |
|                      | Potassium hydroxide (KOH) | 0.405  | kg    |
|                      | Water                     | 0.800  | kg    |
|                      | Heat consumption          | 1.72   | MJ    |
|                      | Electricity consumption   | 0.0119 | kWh   |
| <b>Products</b>      |                           |        |       |
|                      | Potassium iodate          | 0.188  | kg    |
| Precipitate          | Water                     | 0.0966 | kg    |
|                      | Solid waste               | 0.0135 | kg    |
| Solvent              | Potassium iodide          | 1.00   | kg    |
|                      | Water                     | 0.768  | kg    |
|                      | Dissolvable waste         | 0.0714 | kg    |

We conduct inventory analysis for each step in the process of manufacturing PbI<sub>2</sub>. We integrate the results in each step and finally obtain life cycle inventory and the corresponding life cycle impact assessment of 1 kg PbI<sub>2</sub> is shown in Table S1 and Table S2.

## 1.2 CH<sub>3</sub>NH<sub>3</sub>I

The manufacturing route for CH<sub>3</sub>NH<sub>3</sub>I is shown in Figure S3. The process for manufacturing 57% hydriodic acid is derived from the Rhodium Archive.<sup>4</sup> The life cycle inventory and the corresponding life cycle impact assessment of 1 kg CH<sub>3</sub>NH<sub>3</sub>I is shown in Table S4 and Table S5. In order to get the life cycle impact assessment results, the mass of the co-products is used to allocate the environmental impacts of the manufacturing process. Waste is treated with an incineration method. Note that water input and out is not listed in the inventory, but the

corresponding heat consumption for distilled water is considered in the cumulative energy consumption.

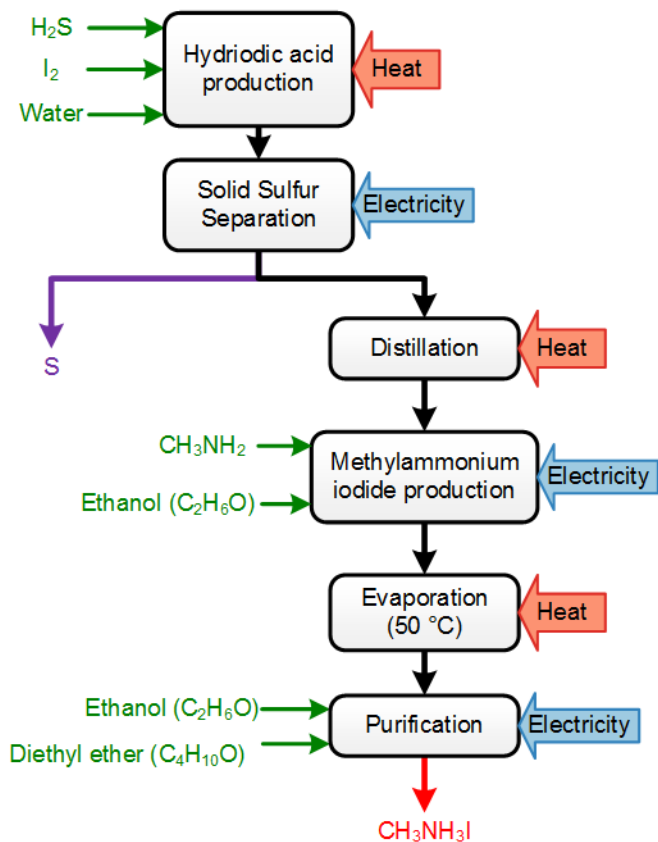

Figure S3. The manufacturing route for  $\text{CH}_3\text{NH}_3\text{I}$ . The representations follow the same manner of Figure S1.

Table S4. Material and energy inventory of a CH<sub>3</sub>NH<sub>3</sub>I manufacturing process

|                                                           | Value | Unit |
|-----------------------------------------------------------|-------|------|
| Process input                                             |       |      |
| Hydrogen sulfide (H <sub>2</sub> S)                       | 0.139 | kg   |
| Iodine (I <sub>2</sub> )                                  | 1.04  | kg   |
| Methylamine (CH <sub>3</sub> NH <sub>2</sub> )            | 0.581 | kg   |
| Ethanol (C <sub>2</sub> H <sub>6</sub> O)                 | 7.31  | kg   |
| Diethyl ether (C <sub>4</sub> H <sub>10</sub> O)          | 20.8  | kg   |
| Cumulative heat consumption                               | 8.30  | MJ   |
| Cumulative electricity consumption                        | 9.24  | kWh  |
| Products                                                  |       |      |
| Methylammonium iodide (CH <sub>3</sub> NH <sub>3</sub> I) | 1.00  | kg   |
| Sulfur (S)                                                | 0.118 | kg   |
| Waste                                                     | 29.9  | kg   |

Table S5. Life cycle impact assessment results for 1 kg CH<sub>3</sub>NH<sub>3</sub>I

| Impact categories/ Endpoint indicators       | Values   | Units                  |
|----------------------------------------------|----------|------------------------|
| Acidification potential                      | 1.64E+00 | kg SO <sub>2</sub> -Eq |
| Eutrophication potential                     | 5.86E-01 | kg PO <sub>4</sub> -Eq |
| Freshwater aquatic ecotoxicity (FAETP 100a)  | 1.19E+02 | kg 1,4-DCB-Eq          |
| Freshwater sediment ecotoxicity (FSETP 100a) | 2.70E+02 | kg 1,4-DCB-Eq          |
| Human toxicity (HTP 100a)                    | 8.10E+01 | kg 1,4-DCB-Eq          |
| Ionising radiation                           | 6.09E-07 | DALYs                  |
| Land use                                     | 1.79E+01 | m <sup>2</sup> a       |
| Malodours air                                | 1.64E+06 | m <sup>3</sup> air     |
| Marine aquatic ecotoxicity (MAETP 100a)      | 4.13E+02 | kg 1,4-DCB-Eq          |
| Marine sediment ecotoxicity (MSETP 100a)     | 4.73E+02 | kg 1,4-DCB-Eq          |
| Photochemical oxidation (EBIR)               | 1.50E-01 | kg formed ozone        |
| Depletion of abiotic resources               | 1.75E+00 | kg antimony-Eq         |
| Stratospheric ozone depletion (ODP 10a)      | 9.13E-05 | kg CFC-11-Eq           |
| Terrestrial ecotoxicity (TAETP 100a)         | 1.19E-01 | kg 1,4-DCB-Eq          |
| Cumulative energy demand                     | 3.96E+03 | MJ-Eq                  |
| Climate change (IPCC 2013)                   | 1.36E+02 | kg CO <sub>2</sub> -Eq |
| Eco-indicator 99 (ecosystem quality)         | 4.34E+01 | points                 |
| Eco-indicator 99 (human health)              | 1.56E+01 | points                 |
| Eco-indicator 99 (resources)                 | 8.88E+00 | points                 |

### 1.3 Spiro-OMeTAD

The manufacturing routes for spiro-OMeTAD are shown in Figure S4 and Figure S5. The processes for manufacturing anisole,<sup>5</sup> 4-iodoanisole,<sup>6</sup> p-anisidine,<sup>7</sup> phenylhydrazine,<sup>8</sup> 2-aminobiphenyl,<sup>9</sup> fluorene,<sup>10</sup> and 9-fluorenone<sup>11</sup> are found in the literature. The routes for producing spiro-OMeTAD from these materials are specified in Yuan's thesis.<sup>12</sup> The life cycle inventory and the corresponding life cycle impact assessment of 1 kg spiro-OMeTAD is shown in Table S6 and Table S7. In order to get the life cycle impact assessment results, the mass of the co-products is used to allocate the environmental impacts of the manufacturing process. Waste is treated with an incineration method. Note that water input and out is not listed in the inventory, but the



corresponding heat consumption for distilled water is considered in the cumulative energy consumption.

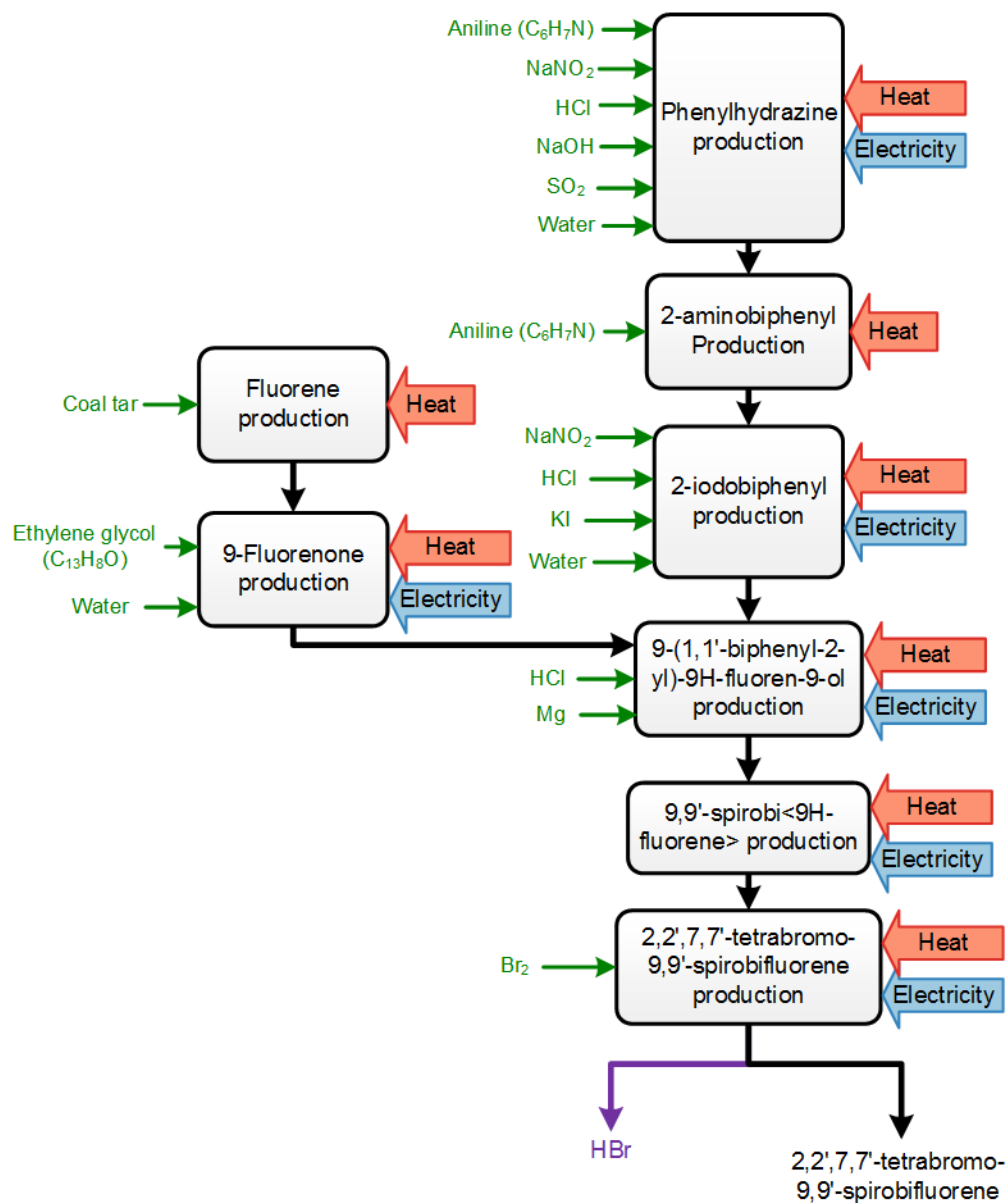

Figure S4. Part A of the manufacturing route for spiro-OMeTAD. The representations follow the same manner of Figure S1.

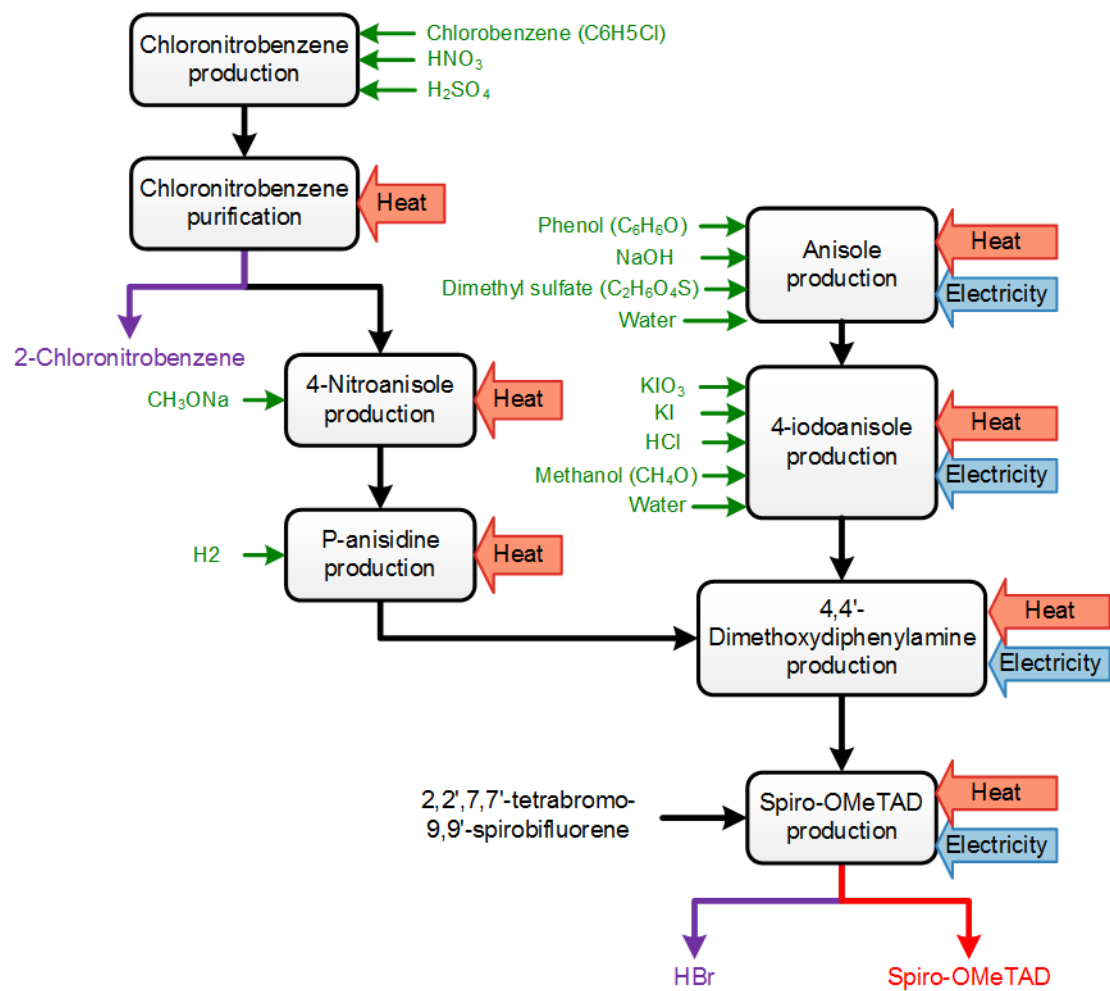

Figure S5. Part B of the manufacturing route for spiro-OMeTAD. The representations follow the same manner of Figure S1.

Table S6. Material and energy inventory of a spiro-OMeTAD manufacturing process

|                                                                               | Value  | Unit |
|-------------------------------------------------------------------------------|--------|------|
| Process input                                                                 |        |      |
| Phenol (C <sub>6</sub> H <sub>6</sub> O)                                      | 0.724  | kg   |
| Sodium hydroxide (NaOH)                                                       | 1.63   | kg   |
| Dimethyl sulfate (C <sub>2</sub> H <sub>6</sub> O <sub>4</sub> S)             | 0.485  | kg   |
| Potassium iodide (KI)                                                         | 0.837  | kg   |
| Potassium iodate (KIO <sub>3</sub> )                                          | 0.412  | kg   |
| Methanol (CH <sub>4</sub> O)                                                  | 2.47   | kg   |
| Hydrogen chloride (HCl) <sup>a</sup>                                          | 5.04   | kg   |
| Hydrogen (H <sub>2</sub> )                                                    | 0.0295 | kg   |
| Sodium methoxide (CH <sub>3</sub> ONa)                                        | 0.279  | kg   |
| Chlorobenzene (C <sub>6</sub> H <sub>5</sub> Cl)                              | 0.966  | kg   |
| Nitric acid (HNO <sub>3</sub> ) <sup>b</sup>                                  | 1.08   | kg   |
| Sulfuric acid (H <sub>2</sub> SO <sub>4</sub> )                               | 1.62   | kg   |
| Bromine (Br <sub>2</sub> )                                                    | 0.604  | kg   |
| Coal tar                                                                      | 0.295  | kg   |
| Ethylene glycol (C <sub>2</sub> H <sub>6</sub> O)                             | 1.06   | kg   |
| Aniline (C <sub>6</sub> H <sub>5</sub> NH <sub>2</sub> )                      | 0.944  | kg   |
| Sodium nitrite (NaNO <sub>2</sub> )                                           | 0.221  | kg   |
| Sulfur dioxide (SO <sub>2</sub> )                                             | 0.407  | kg   |
| Magnesium (Mg)                                                                | 0.0267 | kg   |
| Cumulative heat consumption                                                   | 272    | MJ   |
| Cumulative electricity consumption                                            | 24.3   | kWh  |
| Products                                                                      |        |      |
| Spiro-OMeTAD (C <sub>81</sub> H <sub>88</sub> N <sub>4</sub> O <sub>8</sub> ) | 1.00   | kg   |
| Hydrogen bromide (HBr)                                                        | 0.567  | kg   |
| 2-Chloronitrobenzene (C <sub>6</sub> H <sub>4</sub> ClNO <sub>2</sub> )       | 0.428  | kg   |
| Waste                                                                         | 81.9   | kg   |

a. Commercially available hydrogen chloride of 30 wt% is used.

b. Commercially available nitric acid of 50 wt% is used.

Table S7. Life cycle impact assessment results for 1 kg spiro-OMeTAD

| Impact categories/ Endpoint indicators       | Values   | Units                  |
|----------------------------------------------|----------|------------------------|
| Acidification potential                      | 5.22E-01 | kg SO <sub>2</sub> -Eq |
| Eutrophication potential                     | 5.68E-01 | kg PO <sub>4</sub> -Eq |
| Freshwater aquatic ecotoxicity (FAETP 100a)  | 1.64E+02 | kg 1,4-DCB-Eq          |
| Freshwater sediment ecotoxicity (FSETP 100a) | 3.95E+02 | kg 1,4-DCB-Eq          |
| Human toxicity (HTP 100a)                    | 2.04E+02 | kg 1,4-DCB-Eq          |
| Ionising radiation                           | 2.37E-07 | DALYs                  |
| Land use                                     | 3.90E+00 | m <sup>2</sup> a       |
| Malodours air                                | 1.14E+06 | m <sup>3</sup> air     |
| Marine aquatic ecotoxicity (MAETP 100a)      | 5.53E+02 | kg 1,4-DCB-Eq          |
| Marine sediment ecotoxicity (MSETP 100a)     | 6.73E+02 | kg 1,4-DCB-Eq          |
| Photochemical oxidation (EBIR)               | 1.35E-02 | kg formed ozone        |
| Depletion of abiotic resources               | 8.01E-01 | kg antimony-Eq         |
| Stratospheric ozone depletion (ODP 10a)      | 1.60E-05 | kg CFC-11-Eq           |
| Terrestrial ecotoxicity (TAETP 100a)         | 1.96E-02 | kg 1,4-DCB-Eq          |

|                                      |          |                        |
|--------------------------------------|----------|------------------------|
| Cumulative energy demand             | 1.59E+03 | MJ-Eq                  |
| Climate change (IPCC 2013)           | 9.68E+01 | kg CO <sub>2</sub> -Eq |
| Eco-indicator 99 (ecosystem quality) | 1.74E+00 | points                 |
| Eco-indicator 99 (human health)      | 7.06E+00 | points                 |
| Eco-indicator 99 (resources)         | 3.73E+00 | points                 |

#### 1.4 FTO glass

The life cycle inventory of manufacturing 1 kg FTO glass is shown in Table S8, which is extracted from a paper by Syrrakon *et al.*<sup>13</sup> Based on the life cycle inventory, we derive the corresponding life cycle impact assessment results, shown in Table S9.

Table S8. Material and energy inventory of manufacturing 1 kg FTO glass<sup>13</sup>

|                                           | Values   | Units |
|-------------------------------------------|----------|-------|
| Raw material                              |          |       |
| Silica sand                               | 7.88E-01 | kg    |
| Soda ash                                  | 2.86E-01 | kg    |
| Limestone                                 | 1.41E-01 | kg    |
| Dolomite                                  | 9.10E-02 | kg    |
| Alumina                                   | 4.30E-02 | kg    |
| Cullet                                    | 1.10E-02 | kg    |
| Tin                                       | 5.01E-03 | kg    |
| Chloride                                  | 5.99E-03 | kg    |
| Heat consumption                          | 7.88E-01 | MJ    |
| Air emissions                             |          |       |
| Carbon dioxide                            | 1.28E-01 | kg    |
| Nitrogen oxide                            | 3.00E-03 | kg    |
| Sulphur oxide                             | 2.30E-03 | kg    |
| Methane                                   | 8.15E-04 | kg    |
| Particulates                              | 1.00E-04 | kg    |
| Hydrogen fluoride                         | 2.65E-05 | kg    |
| Lead                                      | 2.22E-05 | kg    |
| Arsenic                                   | 5.00E-06 | kg    |
| Nickel                                    | 5.56E-07 | kg    |
| Water emissions                           |          |       |
| Chloride                                  | 8.20E-02 | kg    |
| COD                                       | 2.31E-04 | kg    |
| Sulfate                                   | 1.80E-04 | kg    |
| Suspended Solids                          | 5.33E-05 | kg    |
| Fluoride                                  | 4.44E-05 | kg    |
| Mineral oil                               | 3.56E-05 | kg    |
| Ammonia                                   | 1.78E-05 | kg    |
| Boric acid                                | 7.11E-06 | kg    |
| Barium                                    | 5.33E-06 | kg    |
| Phenol                                    | 1.78E-06 | kg    |
| Chromium, Copper, tin, lead, nickel, zinc | 8.89E-07 | kg    |
| Arsenic, antimony                         | 5.33E-07 | kg    |
| Cadmium                                   | 5.00E-07 | kg    |
| Solid waste                               | 6.82E-02 | kg    |

Table S9. Life cycle impact assessment results for 1 kg FTO glass

| Impact categories/ Endpoint indicators       | Values   | Units                  |
|----------------------------------------------|----------|------------------------|
| Acidification potential                      | 8.66E-02 | kg SO <sub>2</sub> -Eq |
| Eutrophication potential                     | 2.04E-03 | kg PO <sub>4</sub> -Eq |
| Freshwater aquatic ecotoxicity (FAETP 100a)  | 6.34E-01 | kg 1,4-DCB-Eq          |
| Freshwater sediment ecotoxicity (FSETP 100a) | 1.47E+00 | kg 1,4-DCB-Eq          |
| Human toxicity (HTP 100a)                    | 1.33E+00 | kg 1,4-DCB-Eq          |
| Ionising radiation                           | 1.58E-09 | DALYs                  |
| Land use                                     | 3.98E-02 | m <sup>2</sup> a       |
| Malodours air                                | 2.67E+04 | m <sup>3</sup> air     |
| Marine aquatic ecotoxicity (MAETP 100a)      | 2.32E+00 | kg 1,4-DCB-Eq          |
| Marine sediment ecotoxicity (MSETP 100a)     | 2.63E+00 | kg 1,4-DCB-Eq          |
| Photochemical oxidation (EBIR)               | 1.29E-04 | kg formed ozone        |
| Depletion of abiotic resources               | 1.11E-02 | kg antimony-Eq         |
| Stratospheric ozone depletion (ODP 10a)      | 1.13E-07 | kg CFC-11-Eq           |
| Terrestrial ecotoxicity (TAETP 100a)         | 3.37E-04 | kg 1,4-DCB-Eq          |
| Cumulative energy demand                     | 2.51E+01 | MJ-Eq                  |
| Climate change (IPCC 2013)                   | 1.33E+00 | kg CO <sub>2</sub> -Eq |
| Eco-indicator 99 (ecosystem quality)         | 1.65E-02 | points                 |
| Eco-indicator 99 (human health)              | 7.94E-02 | points                 |
| Eco-indicator 99 (resources)                 | 1.83E-01 | points                 |

### 1.5 ITO glass

As opposed to FTO glass, ITO glass is employed in the ZnO module. We extract the life cycle inventory of 1 m<sup>2</sup> ITO glass from a paper by Garcia-Valverde *et al.*<sup>14</sup> and present the information in Table S10. Accordingly, we calculate the impact indicators of the ITO and show them in Table S11.

Table S10. Material and energy inventory of manufacturing 1 m<sup>2</sup> ITO glass<sup>14</sup>

|                                      | Values   | Units |
|--------------------------------------|----------|-------|
| Indium (In)                          | 2.30E-03 | kg    |
| Tin (Sn)                             | 2.00E-04 | kg    |
| Glass                                | 1.54E+00 | kg    |
| Titanium dioxide (SiO <sub>2</sub> ) | 1.00E-04 | kg    |
| Argon (Ar)                           | 1.24E-01 | kg    |
| Oxygen (O <sub>2</sub> )             | 1.00E-04 | kg    |
| Electricity consumption              | 2.25E+01 | kWh   |

Table S11. Life cycle impact assessment results for 1 m<sup>2</sup> ITO glass

| Impact categories/ Endpoint indicators       | Values   | Units                  |
|----------------------------------------------|----------|------------------------|
| Acidification potential                      | 1.19E-01 | kg SO <sub>2</sub> -Eq |
| Eutrophication potential                     | 2.91E-02 | kg PO <sub>4</sub> -Eq |
| Freshwater aquatic ecotoxicity (FAETP 100a)  | 4.62E+00 | kg 1,4-DCB-Eq          |
| Freshwater sediment ecotoxicity (FSETP 100a) | 9.64E+00 | kg 1,4-DCB-Eq          |
| Human toxicity (HTP 100a)                    | 4.67E+00 | kg 1,4-DCB-Eq          |
| Ionising radiation                           | 1.20E-07 | DALYs                  |

|                                          |          |                        |
|------------------------------------------|----------|------------------------|
| Land use                                 | 1.01E+00 | m <sup>2</sup> a       |
| Malodours air                            | 3.78E+04 | m <sup>3</sup> air     |
| Marine aquatic ecotoxicity (MAETP 100a)  | 1.67E+01 | kg 1,4-DCB-Eq          |
| Marine sediment ecotoxicity (MSETP 100a) | 1.70E+01 | kg 1,4-DCB-Eq          |
| Photochemical oxidation (EBIR)           | 9.10E-04 | kg formed ozone        |
| Depletion of abiotic resources           | 1.44E-01 | kg antimony-Eq         |
| Stratospheric ozone depletion (ODP 10a)  | 8.56E-07 | kg CFC-11-Eq           |
| Terrestrial ecotoxicity (TAETP 100a)     | 3.26E-03 | kg 1,4-DCB-Eq          |
| Cumulative energy demand                 | 3.14E+02 | MJ-Eq                  |
| Climate change (IPCC 2013)               | 1.54E+01 | kg CO <sub>2</sub> -Eq |
| Eco-indicator 99 (ecosystem quality)     | 2.17E-01 | points                 |
| Eco-indicator 99 (human health)          | 4.11E-01 | points                 |
| Eco-indicator 99 (resources)             | 6.16E-01 | points                 |

## 1.6 BL-TiO<sub>2</sub> ink

The blocking-layer TiO<sub>2</sub> ink (BL-TiO<sub>2</sub> ink) is prepared according to Kavan's method.<sup>15</sup> The corresponding life cycle inventory is summarized in Table S12 and the corresponding life cycle impact assessment results are shown in Table S13.

Table S12. Material and energy inventory of 1 kg BL-TiO<sub>2</sub> ink

|                                                                  | Value    | Unit |
|------------------------------------------------------------------|----------|------|
| Titanium tetrachloride (TiCl <sub>4</sub> )                      | 4.81E-02 | kg   |
| Isopropanol (C <sub>3</sub> H <sub>8</sub> O)                    | 6.08E-02 | kg   |
| Acetone (C <sub>3</sub> H <sub>6</sub> O)                        | 2.94E-02 | kg   |
| Acetic anhydride (C <sub>4</sub> H <sub>6</sub> O <sub>3</sub> ) | 5.18E-02 | kg   |
| Ethanol (C <sub>2</sub> H <sub>6</sub> O)                        | 9.08E-01 | kg   |
| Heat consumption                                                 | 1.54E-03 | MJ   |
| Electricity consumption                                          | 7.04E-05 | kWh  |

Table S13. Life cycle impact assessment results for 1 kg BL-TiO<sub>2</sub> ink

| Impact categories/ Endpoint indicators       | Values   | Units                  |
|----------------------------------------------|----------|------------------------|
| Acidification potential                      | 1.22E-02 | kg SO <sub>2</sub> -Eq |
| Eutrophication potential                     | 6.07E-03 | kg PO <sub>4</sub> -Eq |
| Freshwater aquatic ecotoxicity (FAETP 100a)  | 6.25E-01 | kg 1,4-DCB-Eq          |
| Freshwater sediment ecotoxicity (FSETP 100a) | 1.15E+00 | kg 1,4-DCB-Eq          |
| Human toxicity (HTP 100a)                    | 5.17E-01 | kg 1,4-DCB-Eq          |
| Ionising radiation                           | 3.19E-09 | DALYs                  |
| Land use                                     | 1.06E+00 | m <sup>2</sup> a       |
| Malodours air                                | 2.96E+04 | m <sup>3</sup> air     |
| Marine aquatic ecotoxicity (MAETP 100a)      | 1.65E+00 | kg 1,4-DCB-Eq          |
| Marine sediment ecotoxicity (MSETP 100a)     | 1.83E+00 | kg 1,4-DCB-Eq          |
| Photochemical oxidation (EBIR)               | 6.98E-04 | kg formed ozone        |
| Depletion of abiotic resources               | 1.28E-02 | kg antimony-Eq         |
| Stratospheric ozone depletion (ODP 10a)      | 1.37E-07 | kg CFC-11-Eq           |
| Terrestrial ecotoxicity (TAETP 100a)         | 6.18E-03 | kg 1,4-DCB-Eq          |
| Cumulative energy demand                     | 4.97E+01 | MJ-Eq                  |

|                                      |          |                        |
|--------------------------------------|----------|------------------------|
| Climate change (IPCC 2013)           | 1.54E+00 | kg CO <sub>2</sub> -Eq |
| Eco-indicator 99 (ecosystem quality) | 5.09E+00 | points                 |
| Eco-indicator 99 (human health)      | 7.62E-02 | points                 |
| Eco-indicator 99 (resources)         | 6.52E-02 | points                 |

### 1.7 nc-TiO<sub>2</sub> ink

The nanocrystalline TiO<sub>2</sub> (nc-TiO<sub>2</sub>) ink is assumed a mixture of Titanium dioxide and terpineol according to commercial products.<sup>16</sup> The life cycle inventory of the nc-TiO<sub>2</sub> ink is shown in Table S14 and the life cycle impact assessment results are shown in Table S15.

Table S14. Material and energy inventory of 1 kg nc-TiO<sub>2</sub> ink

|                                               | Value | Unit |
|-----------------------------------------------|-------|------|
| Titanium dioxide (TiO <sub>2</sub> )          | 0.153 | kg   |
| Terpineol (C <sub>10</sub> H <sub>18</sub> O) | 0.847 | kg   |

Table S15. Life cycle impact assessment results for 1 kg nc-TiO<sub>2</sub> ink

| Impact categories/ Endpoint indicators       | Values   | Units                  |
|----------------------------------------------|----------|------------------------|
| Acidification potential                      | 1.22E-02 | kg SO <sub>2</sub> -Eq |
| Eutrophication potential                     | 6.07E-03 | kg PO <sub>4</sub> -Eq |
| Freshwater aquatic ecotoxicity (FAETP 100a)  | 6.25E-01 | kg 1,4-DCB-Eq          |
| Freshwater sediment ecotoxicity (FSETP 100a) | 1.15E+00 | kg 1,4-DCB-Eq          |
| Human toxicity (HTP 100a)                    | 5.17E-01 | kg 1,4-DCB-Eq          |
| Ionising radiation                           | 3.19E-09 | DALYs                  |
| Land use                                     | 1.06E+00 | m <sup>2</sup> a       |
| Malodours air                                | 2.96E+04 | m <sup>3</sup> air     |
| Marine aquatic ecotoxicity (MAETP 100a)      | 1.65E+00 | kg 1,4-DCB-Eq          |
| Marine sediment ecotoxicity (MSETP 100a)     | 1.83E+00 | kg 1,4-DCB-Eq          |
| Photochemical oxidation (EBIR)               | 6.98E-04 | kg formed ozone        |
| Depletion of abiotic resources               | 1.28E-02 | kg antimony-Eq         |
| Stratospheric ozone depletion (ODP 10a)      | 1.37E-07 | kg CFC-11-Eq           |
| Terrestrial ecotoxicity (TAETP 100a)         | 6.18E-03 | kg 1,4-DCB-Eq          |
| Cumulative energy demand                     | 4.97E+01 | MJ-Eq                  |
| Climate change (IPCC 2013)                   | 1.54E+00 | kg CO <sub>2</sub> -Eq |
| Eco-indicator 99 (ecosystem quality)         | 5.09E+00 | points                 |
| Eco-indicator 99 (human health)              | 7.62E-02 | points                 |
| Eco-indicator 99 (resources)                 | 6.52E-02 | points                 |

### 1.8 ZnO ink

The ZnO ink is prepared following the method by Liu *et al.*<sup>17</sup> The corresponding material and energy inventory and life cycle impact assessment results of 1 kg ZnO ink are shown in Table S16 and Table S17, respectively.

Table S16. Material and energy inventory of 1 kg ZnO ink

|                                                                 | Values   | Units |
|-----------------------------------------------------------------|----------|-------|
| Zinc oxide (ZnO)                                                | 7.13E-03 | kg    |
| Acetic acid (C <sub>2</sub> H <sub>4</sub> O <sub>2</sub> )     | 1.05E-02 | kg    |
| Hydrogen peroxide (H <sub>2</sub> O <sub>2</sub> ) <sup>a</sup> | 8.00E-05 | kg    |

|                                              |          |     |
|----------------------------------------------|----------|-----|
| Potassium hydroxide (KOH)                    | 9.64E-03 | kg  |
| n-Butanol (C <sub>4</sub> H <sub>10</sub> O) | 8.27E-01 | kg  |
| Methanol (CH <sub>4</sub> O)                 | 1.24E+00 | kg  |
| Chloroform (CHCl <sub>3</sub> )              | 1.08E-01 | kg  |
| Waste                                        | 3.35E-02 | kg  |
| Heat consumption                             | 1.40E+00 | MJ  |
| Electricity consumption                      | 4.11E+00 | kWh |

a. Commercially available hydrogen peroxide of 50 wt% is used.

Table S17. Life cycle impact assessment results for 1 kg ZnO ink

| Impact categories/ Endpoint indicators       | Values   | Units                  |
|----------------------------------------------|----------|------------------------|
| Acidification potential                      | 4.13E-02 | kg SO <sub>2</sub> -Eq |
| Eutrophication potential                     | 8.88E-03 | kg PO <sub>4</sub> -Eq |
| Freshwater aquatic ecotoxicity (FAETP 100a)  | 1.65E+00 | kg 1,4-DCB-Eq          |
| Freshwater sediment ecotoxicity (FSETP 100a) | 3.49E+00 | kg 1,4-DCB-Eq          |
| Human toxicity (HTP 100a)                    | 1.74E+00 | kg 1,4-DCB-Eq          |
| Ionising radiation                           | 2.75E-08 | DALYs                  |
| Land use                                     | 3.22E-01 | m <sup>2</sup> a       |
| Malodours air                                | 8.52E+04 | m <sup>3</sup> air     |
| Marine aquatic ecotoxicity (MAETP 100a)      | 5.79E+00 | kg 1,4-DCB-Eq          |
| Marine sediment ecotoxicity (MSETP 100a)     | 6.13E+00 | kg 1,4-DCB-Eq          |
| Photochemical oxidation (EBIR)               | 4.47E-03 | kg formed ozone        |
| Depletion of abiotic resources               | 7.95E-02 | kg antimony-Eq         |
| Stratospheric ozone depletion (ODP 10a)      | 1.36E-04 | kg CFC-11-Eq           |
| Terrestrial ecotoxicity (TAETP 100a)         | 8.11E-04 | kg 1,4-DCB-Eq          |
| Cumulative energy demand                     | 1.71E+02 | MJ-Eq                  |
| Climate change (IPCC 2013)                   | 5.74E+00 | kg CO <sub>2</sub> -Eq |
| Eco-indicator 99 (ecosystem quality)         | 5.39E-02 | points                 |
| Eco-indicator 99 (human health)              | 2.55E-01 | points                 |
| Eco-indicator 99 (resources)                 | 3.97E-01 | points                 |

## 1.9 Silver paste

The silver paste used in the TiO<sub>2</sub> module consists of 70% silver powder and 30% thinner, which is butyl acetate.<sup>18</sup> The silver powder is prepared following a US patent by Irizarry and Yang.<sup>19</sup> We show the life cycle inventory and life cycle impact assessment results in Table S18 and Table S19, respectively.

Table S18. Material and energy inventory of 1 kg silver paste

|                                                                | Values   | Units |
|----------------------------------------------------------------|----------|-------|
| Process input                                                  |          |       |
| Silver solid                                                   | 7.00E-01 | kg    |
| Nitric acid (HNO <sub>3</sub> ) <sup>a</sup>                   | 2.02E+00 | kg    |
| Reducing agent (C <sub>7</sub> H <sub>14</sub> )               | 8.82E-01 | kg    |
| Butyl acetate (C <sub>6</sub> H <sub>12</sub> O <sub>2</sub> ) | 3.00E-01 | kg    |
| Emissions                                                      |          | kg    |
| Nitrogen dioxide (NO <sub>2</sub> )                            | 2.99E-01 | kg    |

a. Commercially available nitric acid of 50 wt% is used.



Table S19. Life cycle impact assessment results for 1 kg silver paste

| Impact categories/ Endpoint indicators       | Values   | Units                  |
|----------------------------------------------|----------|------------------------|
| Acidification potential                      | 2.65E+00 | kg SO <sub>2</sub> -Eq |
| Eutrophication potential                     | 1.41E+01 | kg PO <sub>4</sub> -Eq |
| Freshwater aquatic ecotoxicity (FAETP 100a)  | 3.69E+03 | kg 1,4-DCB-Eq          |
| Freshwater sediment ecotoxicity (FSETP 100a) | 7.03E+03 | kg 1,4-DCB-Eq          |
| Human toxicity (HTP 100a)                    | 1.69E+02 | kg 1,4-DCB-Eq          |
| Ionising radiation                           | 1.24E-07 | DALYs                  |
| Land use                                     | 1.81E+01 | m <sup>2</sup> a       |
| Malodours air                                | 9.74E+05 | m <sup>3</sup> air     |
| Marine aquatic ecotoxicity (MAETP 100a)      | 1.25E+04 | kg 1,4-DCB-Eq          |
| Marine sediment ecotoxicity (MSETP 100a)     | 1.19E+04 | kg 1,4-DCB-Eq          |
| Photochemical oxidation (EBIR)               | 5.47E-03 | kg formed ozone        |
| Depletion of abiotic resources               | 1.90E+00 | kg antimony-Eq         |
| Stratospheric ozone depletion (ODP 10a)      | 1.20E-05 | kg CFC-11-Eq           |
| Terrestrial ecotoxicity (TAETP 100a)         | 1.55E-01 | kg 1,4-DCB-Eq          |
| Cumulative energy demand                     | 1.56E+03 | MJ-Eq                  |
| Climate change (IPCC 2013)                   | 8.23E+01 | kg CO <sub>2</sub> -Eq |
| Eco-indicator 99 (ecosystem quality)         | 2.24E+01 | points                 |
| Eco-indicator 99 (human health)              | 2.26E+02 | points                 |
| Eco-indicator 99 (resources)                 | 3.79E+00 | points                 |

## 2. Characterization factors from Ecoinvent

In Table S20 and Table S21, we show all the characterization factors we extract from Ecoinvent database and use to evaluate the above constituents of the two types of perovskite solar modules.<sup>20</sup> The characterization factors for coproduced precious metals, such silver and gold, are calculated using the market prices-based allocation method.

Table S20. Characterization factors used in the evaluation part I

| item                           | value | unit | acidification | eutrophication | freshwater aquatic ecotoxicity | freshwater sediment ecotoxicity | human toxicity | ionising radiation | land use | malodours air | marine aquatic ecotoxicity |
|--------------------------------|-------|------|---------------|----------------|--------------------------------|---------------------------------|----------------|--------------------|----------|---------------|----------------------------|
| electricity                    | 1     | kWh  | 4.31E-03      | 1.11E-03       | 1.76E-01                       | 3.70E-01                        | 1.70E-01       | 5.17E-09           | 4.02E-02 | 7.37E+02      | 6.25E-01                   |
| heat                           | 1     | MJ   | 2.39E-04      | 8.92E-06       | 2.95E-03                       | 6.61E-03                        | 9.09E-03       | 9.54E-12           | 1.07E-04 | 1.82E+03      | 1.10E-02                   |
| Iodine (I2)                    | 1     | kg   | 2.69E-02      | 5.39E-03       | 8.68E-01                       | 1.87E+00                        | 1.18E+00       | 7.93E-09           | 1.13E-01 | 3.18E+04      | 3.38E+00                   |
| potassium hydroxide (KOH)      | 1     | kg   | 1.50E-02      | 3.62E-03       | 7.31E-01                       | 1.59E+00                        | 8.24E-01       | 6.72E-09           | 1.60E-01 | 1.87E+04      | 2.65E+00                   |
| lead (Pb)                      | 1     | kg   | 2.52E-02      | 8.51E-03       | 1.04E+00                       | 2.10E+00                        | 6.79E-01       | 7.31E-09           | 6.26E-01 | 1.39E+04      | 3.79E+00                   |
| nitric acid (HNO3) (50%)       | 1     | kg   | 1.16E-02      | 4.43E-03       | 2.11E-01                       | 4.70E-01                        | 4.85E-01       | 8.58E-10           | 2.17E-02 | 1.64E+04      | 1.10E+00                   |
| hydrogen sulfide (H2S)         | 1     | kg   | 2.69E-03      | 1.10E-03       | 2.27E-01                       | 4.98E-01                        | 2.92E-01       | 1.74E-09           | 3.06E-02 | 3.38E+03      | 8.10E-01                   |
| methylamine (CH3NH2)           | 1     | kg   | 2.09E-02      | 4.42E-03       | 5.93E-01                       | 1.23E+00                        | 1.11E+00       | 4.81E-09           | 7.30E-02 | 8.84E+04      | 3.20E+00                   |
| ethanol (C2H6O)                | 1     | kg   | 1.03E-02      | 5.70E-03       | 4.63E-01                       | 7.49E-01                        | 4.22E-01       | 2.47E-09           | 1.14E+00 | 1.42E+04      | 1.02E+00                   |
| diethyl ether (C4H10O)         | 1     | kg   | 7.00E-02      | 1.70E-02       | 2.85E+00                       | 6.09E+00                        | 2.94E+00       | 2.52E-08           | 4.12E-01 | 6.55E+04      | 1.03E+01                   |
| phenol (C6H6O)                 | 1     | kg   | 1.80E-02      | 6.04E-03       | 9.31E-01                       | 2.01E+00                        | 1.39E+01       | 4.97E-09           | 1.12E-01 | 5.25E+04      | 3.38E+00                   |
| sodium hydroxide (NaOH) (50%)  | 1     | kg   | 8.70E-03      | 2.44E-03       | 4.72E-01                       | 1.03E+00                        | 4.94E-01       | 4.90E-09           | 7.31E-02 | 9.32E+03      | 1.70E+00                   |
| dimethyl sulfate (C2H6O4S)     | 1     | kg   | 1.73E-02      | 4.09E-03       | 7.41E-01                       | 1.56E+00                        | 8.41E-01       | 4.29E-09           | 8.27E-02 | 4.17E+04      | 2.60E+00                   |
| Potassium iodide (KI)          | 1     | kg   | 2.85E-02      | 6.39E-03       | 1.21E+00                       | 2.68E+00                        | 1.35E+00       | 8.99E-09           | 1.49E-01 | 4.57E+04      | 4.50E+00                   |
| Potassium iodate (KIO3)        | 1     | kg   | 3.19E-02      | 6.54E-03       | 1.26E+00                       | 2.80E+00                        | 1.48E+00       | 9.13E-09           | 1.51E-01 | 7.17E+04      | 4.69E+00                   |
| methanol (CH4O)                | 1     | kg   | 6.49E-03      | 5.48E-04       | 1.63E-01                       | 2.95E-01                        | 1.14E-01       | 5.78E-10           | 6.10E-03 | 5.06E+04      | 4.95E-01                   |
| hydrochloric acid (HCl) (30%)  | 1     | kg   | 1.15E-02      | 3.24E-03       | 6.84E-01                       | 1.49E+00                        | 7.61E-01       | 6.33E-09           | 1.00E-01 | 1.17E+04      | 2.45E+00                   |
| sulfuric acid (H2SO4)          | 1     | kg   | 7.24E-03      | 3.69E-04       | 1.02E-01                       | 2.26E-01                        | 1.66E-01       | 7.06E-10           | 1.11E-02 | 3.14E+03      | 3.68E-01                   |
| chlorobenzene (C6H5Cl)         | 1     | kg   | 1.68E-02      | 1.46E-02       | 9.74E-01                       | 2.06E+00                        | 2.16E+02       | 5.42E-09           | 1.27E-01 | 1.31E+04      | 3.41E+00                   |
| sodium methoxide (CH3ONa)      | 1     | kg   | 3.96E-03      | 1.26E-03       | 1.88E-01                       | 4.02E-01                        | 1.67E-01       | 2.41E-09           | 2.78E-02 | 6.41E+03      | 6.73E-01                   |
| hydrogen (H2)                  | 1     | kg   | 1.12E-01      | 3.14E-02       | 6.08E+00                       | 1.32E+01                        | 6.36E+00       | 6.31E-08           | 9.41E-01 | 1.20E+05      | 2.19E+01                   |
| aniline (C6H7N)                | 1     | kg   | 3.06E-02      | 9.07E-03       | 1.21E+00                       | 2.61E+00                        | 3.62E+00       | 5.79E-09           | 1.39E-01 | 2.70E+04      | 4.81E+00                   |
| sodium nitrite (NaNO2)         | 1     | kg   | 1.90E-02      | 6.36E-03       | 9.13E-01                       | 1.99E+00                        | 1.25E+00       | 9.66E-09           | 1.27E-01 | 2.74E+04      | 3.84E+00                   |
| sulfur dioxide (SO2)           | 1     | kg   | 5.09E-02      | 9.52E-04       | 2.25E-01                       | 4.96E-01                        | 3.26E-01       | 2.60E-09           | 2.93E-02 | 9.28E+03      | 8.25E-01                   |
| coal tar                       | 1     | kg   | 4.34E-03      | 1.17E-03       | 2.76E-01                       | 6.05E-01                        | 3.26E-01       | 2.27E-09           | 3.71E-02 | 5.47E+03      | 9.85E-01                   |
| ethylene glycol (C2H6O2)       | 1     | kg   | 7.85E-03      | 2.33E-03       | 4.54E-01                       | 9.91E-01                        | 7.29E-01       | 3.83E-09           | 5.95E-02 | 1.12E+04      | 1.61E+00                   |
| magnesium (Mg)                 | 1     | kg   | 6.31E-02      | 8.39E-03       | 9.37E-01                       | 2.03E+00                        | 3.76E+00       | 8.33E-09           | 1.32E-01 | 6.14E+05      | 3.55E+00                   |
| bromine (Br2)                  | 1     | kg   | 2.73E-02      | 5.43E-03       | 8.80E-01                       | 1.89E+00                        | 1.19E+00       | 7.97E-09           | 1.14E-01 | 3.21E+04      | 3.42E+00                   |
| zinc oxide (ZnO)               | 1     | kg   | 7.32E-03      | 1.25E-03       | 3.92E-01                       | 8.82E-01                        | 5.74E-01       | 1.68E-09           | 3.95E-02 | 3.62E+04      | 1.93E+00                   |
| acetic acid (C2H4O2) (98%)     | 1     | kg   | 1.30E-02      | 2.64E-03       | 5.72E-01                       | 1.22E+00                        | 6.52E-01       | 6.10E-09           | 8.30E-02 | 1.16E+05      | 2.04E+00                   |
| hydrogen peroxide (H2O2) (50%) | 1     | kg   | 6.84E-03      | 1.66E-03       | 6.92E-01                       | 1.43E+00                        | 3.67E+00       | 2.66E-09           | 6.38E-02 | 1.23E+04      | 2.44E+00                   |
| n-Butanol (C4H10O)             | 1     | kg   | 1.58E-02      | 3.27E-03       | 5.54E-01                       | 1.20E+00                        | 6.89E-01       | 5.60E-09           | 1.60E-01 | 1.30E+04      | 2.06E+00                   |
| chloroform (CHCl3)             | 1     | kg   | 1.35E-02      | 3.13E-03       | 6.71E-01                       | 1.47E+00                        | 1.11E+00       | 6.05E-09           | 9.45E-02 | 3.34E+04      | 2.42E+00                   |
| Indium (In)                    | 1     | kg   | 2.64E+00      | 9.23E-01       | 1.88E+02                       | 3.63E+02                        | 2.51E+02       | 2.09E-07           | 1.05E+01 | 1.58E+06      | 7.73E+02                   |
| Tin (Sn)                       | 1     | kg   | 5.07E-01      | 5.10E-02       | 5.65E+00                       | 1.23E+01                        | 6.78E+00       | 7.36E-08           | 2.11E+00 | 1.25E+05      | 2.07E+01                   |
| glass                          | 1     | kg   | 9.84E-03      | 1.05E-03       | 1.06E-01                       | 2.30E-01                        | 1.49E-01       | 1.08E-09           | 4.80E-02 | 1.06E+04      | 4.05E-01                   |
| silica sand                    | 1     | kg   | 2.61E-04      | 4.88E-05       | 6.20E-03                       | 1.34E-02                        | 1.08E-02       | 4.11E-11           | 4.96E-03 | 5.88E+02      | 2.57E-02                   |
| argon (Ar)                     | 1     | kg   | 9.85E-03      | 3.56E-03       | 4.63E-01                       | 9.91E-01                        | 2.93E-01       | 7.94E-09           | 7.37E-02 | 9.13E+03      | 1.67E+00                   |
| oxygen (O2)                    | 1     | kg   | 4.49E-03      | 1.06E-03       | 1.74E-01                       | 3.74E-01                        | 1.25E-01       | 2.56E-09           | 2.86E-02 | 3.82E+03      | 6.31E-01                   |
| nitrogen (N2)                  | 1     | kg   | 4.35E-03      | 1.02E-03       | 1.68E-01                       | 3.62E-01                        | 1.21E-01       | 2.48E-09           | 2.77E-02 | 3.70E+03      | 6.11E-01                   |
| ethylene vinyl acetate         | 1     | kg   | 8.46E-03      | 2.04E-03       | 3.62E-01                       | 7.87E-01                        | 4.39E-01       | 2.74E-09           | 5.22E-02 | 3.80E+04      | 1.28E+00                   |
| aluminium (Al)                 | 1     | kg   | 7.08E-02      | 1.10E-02       | 1.08E+01                       | 2.55E+01                        | 2.29E+01       | 8.19E-09           | 2.45E-01 | 5.87E+04      | 3.84E+01                   |
| Ilmenite                       | 1     | kg   | 3.84E-04      | 6.65E-05       | 7.08E-03                       | 1.55E-02                        | 1.47E-02       | 2.68E-10           | 3.02E-03 | 1.85E+02      | 3.13E-02                   |
| Iron pellet/powder             | 1     | kg   | 1.22E-03      | 2.96E-04       | 3.25E-02                       | 7.01E-02                        | 3.89E-02       | 2.97E-10           | 5.25E-03 | 7.89E+02      | 1.22E-01                   |
| methane (CH4)                  | 1     | kg   | 7.76E-03      | 4.34E-03       | 3.40E-01                       | 7.40E-01                        | 8.68E-01       | 3.76E-09           | 7.92E+00 | 9.96E+03      | 1.14E+00                   |
| Gold (Au)                      | 1     | kg   | 2.03E+02      | 1.20E+03       | 3.14E+05                       | 5.98E+05                        | 1.41E+04       | 9.80E-06           | 1.50E+03 | 7.12E+07      | 1.06E+06                   |
| soda ash                       | 1     | kg   | 5.27E-03      | 2.64E-03       | 3.35E-01                       | 7.37E-01                        | 6.65E-01       | 2.36E-09           | 4.44E-02 | 1.24E+04      | 1.37E+00                   |
| limestone                      | 1     | kg   | 5.15E-05      | 1.39E-05       | 4.24E-04                       | 9.31E-04                        | 1.88E-03       | 5.09E-12           | 1.70E-04 | 2.13E+01      | 1.64E-03                   |
| dolomite                       | 1     | kg   | 3.05E-04      | 6.68E-05       | 9.72E-03                       | 2.09E-02                        | 1.12E-02       | 1.12E-10           | 3.03E-03 | 2.13E+02      | 3.61E-02                   |
| cullet                         | 1     | kg   | 3.94E-05      | 2.85E-05       | 1.70E-02                       | 3.74E-02                        | 4.71E-03       | 1.91E-11           | 8.37E-04 | 6.61E+01      | 5.76E-02                   |
| deionised water                | 1     | kg   | 1.00E-05      | 3.55E-06       | 1.07E-03                       | 2.48E-03                        | 5.89E-04       | 7.01E-12           | 8.49E-05 | 1.25E+01      | 3.65E-03                   |
| chlorine (Cl2)                 | 1     | kg   | 8.43E-03      | 2.36E-03       | 4.58E-01                       | 9.96E-01                        | 4.78E-01       | 4.74E-09           | 7.08E-02 | 9.02E+03      | 1.65E+00                   |

|                                 |   |    |          |          |          |          |          |          |          |          |          |
|---------------------------------|---|----|----------|----------|----------|----------|----------|----------|----------|----------|----------|
| titanium dioxide (TiO2)         | 1 | kg | 4.52E-02 | 1.38E-02 | 6.73E+00 | 1.57E+01 | 2.31E+00 | 1.78E-08 | 5.23E-01 | 4.35E+04 | 2.37E+01 |
| isopropanol (C3H8O)             | 1 | kg | 7.51E-03 | 4.32E-03 | 2.58E-01 | 5.60E-01 | 3.59E-01 | 1.17E-09 | 4.46E-02 | 9.97E+03 | 9.45E-01 |
| acetone (C3H6O)                 | 1 | kg | 1.02E-02 | 1.09E-03 | 2.86E-02 | 6.28E-02 | 7.84E-02 | 9.65E-12 | 5.04E-04 | 1.98E+02 | 1.22E-01 |
| acetic anhydride (C4H6O3)       | 1 | kg | 2.19E-02 | 6.11E-03 | 9.97E-01 | 2.14E+00 | 1.22E+00 | 9.89E-09 | 2.18E-01 | 2.93E+05 | 3.62E+00 |
| methylcyclohexane (C7H14)       | 1 | kg | 2.06E-02 | 3.81E-03 | 5.27E-01 | 1.13E+00 | 8.67E-01 | 2.71E-09 | 2.66E-01 | 2.81E+04 | 2.04E+00 |
| butyl acetate (C6H12O2)         | 1 | kg | 2.04E-02 | 5.39E-03 | 8.88E-01 | 1.92E+00 | 1.14E+00 | 8.71E-09 | 2.37E-01 | 1.52E+05 | 3.27E+00 |
| silver (Ag)                     | 1 | kg | 3.42E+00 | 2.01E+01 | 5.27E+03 | 1.00E+04 | 2.36E+02 | 1.65E-07 | 2.53E+01 | 1.20E+06 | 1.78E+04 |
| adhesive                        | 1 | kg | 3.12E-03 | 6.57E-04 | 9.39E-02 | 2.04E-01 | 2.31E-01 | 2.40E-09 | 8.99E-02 | 5.98E+03 | 3.79E-01 |
| dimethylformamide (C3H7NO)      | 1 | kg | 2.18E-02 | 9.30E-03 | 8.32E-01 | 1.76E+00 | 1.16E+00 | 7.78E-09 | 1.23E-01 | 9.99E+05 | 3.45E+00 |
| PET                             | 1 | kg | 1.34E-02 | 3.53E-03 | 6.84E-01 | 1.49E+00 | 1.15E+00 | 5.04E-09 | 1.32E-01 | 2.46E+04 | 2.58E+00 |
| incineration of average residue | 1 | kg | 1.15E-03 | 5.78E-03 | 1.81E+00 | 4.42E+00 | 4.51E-01 | 3.04E-10 | 1.82E-02 | 2.37E+03 | 6.06E+00 |
| inert material landfill         | 1 | kg | 4.74E-05 | 9.03E-06 | 5.93E-04 | 1.32E-03 | 2.64E-03 | 1.65E-11 | 1.66E-03 | 7.82E+01 | 2.55E-03 |

Table S21. Characterization factors used in the evaluation part II

| item                           | value | unit | marine sediment ecotoxicity | photochemical oxidation | depletion of abiotic resources | stratospheric ozone depletion | terrestrial ecotoxicity | cumulative energy demand (MJ-eq) | climate change (IPCC 2013) | Eco-indicator 99 (ecosystem quality) | Eco-indicator 99 (human health) | Eco-indicator 99 (resources) |
|--------------------------------|-------|------|-----------------------------|-------------------------|--------------------------------|-------------------------------|-------------------------|----------------------------------|----------------------------|--------------------------------------|---------------------------------|------------------------------|
| electricity                    | 1     | kWh  | 6.34E-01                    | 3.30E-05                | 5.72E-03                       | 3.13E-08                      | 7.16E-05                | 1.27E+01                         | 6.12E-01                   | 5.95E-03                             | 1.24E-02                        | 2.32E-02                     |
| heat                           | 1     | MJ   | 1.19E-02                    | 4.97E-06                | 5.71E-04                       | 3.32E-09                      | 1.46E-06                | 1.17E+00                         | 6.19E-02                   | 6.65E-05                             | 7.72E-04                        | 3.13E-03                     |
| Iodine (I2)                    | 1     | kg   | 3.64E+00                    | 6.13E-04                | 7.84E-02                       | 1.07E-06                      | 9.65E-04                | 7.14E+01                         | 4.66E+00                   | 3.06E-02                             | 1.98E-01                        | 1.73E-01                     |
| potassium hydroxide (KOH)      | 1     | kg   | 2.87E+00                    | 2.20E-04                | 1.61E-02                       | 1.36E-07                      | 4.52E-04                | 3.37E+01                         | 1.90E+00                   | 2.51E-02                             | 2.20E-01                        | 7.31E-02                     |
| lead (Pb)                      | 1     | kg   | 3.83E+00                    | 7.78E-04                | 1.49E-02                       | 1.34E-07                      | 1.05E-03                | 3.04E+01                         | 1.55E+00                   | 9.32E-02                             | 2.39E-01                        | 4.18E-01                     |
| nitric acid (HNO3) (50%)       | 1     | kg   | 1.22E+00                    | 7.47E-05                | 6.09E-03                       | 7.55E-08                      | 5.48E-04                | 1.31E+01                         | 3.02E+00                   | 1.44E-02                             | 4.77E-02                        | 3.55E-02                     |
| hydrogen sulfide (H2S)         | 1     | kg   | 8.99E-01                    | 5.44E-05                | 5.09E-03                       | 6.18E-08                      | 1.43E-04                | 1.06E+01                         | 4.03E-01                   | 7.05E-03                             | 3.60E-02                        | 2.50E-02                     |
| methylamine (CH3NH2)           | 1     | kg   | 3.46E+00                    | 9.91E-04                | 3.45E-02                       | 4.03E-07                      | 1.83E-03                | 7.32E+01                         | 2.17E+00                   | 2.54E-02                             | 1.08E-01                        | 1.91E-01                     |
| ethanol (C2H6O)                | 1     | kg   | 1.12E+00                    | 1.74E-04                | 8.12E-03                       | 8.41E-08                      | 6.72E-03                | 4.19E+01                         | 1.19E+00                   | 5.61E+00                             | 5.37E-02                        | 4.02E-02                     |
| diethyl ether (C4H10O)         | 1     | kg   | 1.10E+01                    | 7.03E-03                | 7.22E-02                       | 4.26E-06                      | 3.06E-03                | 1.61E+02                         | 5.02E+00                   | 8.93E-02                             | 6.42E-01                        | 3.79E-01                     |
| phenol (C6H6O)                 | 1     | kg   | 3.65E+00                    | 3.48E-03                | 5.69E-02                       | 3.28E-07                      | 4.09E-04                | 1.19E+02                         | 3.97E+00                   | 2.79E-02                             | 1.87E-01                        | 2.95E-01                     |
| sodium hydroxide (NaOH) (50%)  | 1     | kg   | 1.85E+00                    | 1.01E-04                | 8.71E-03                       | 1.24E-06                      | 2.89E-04                | 1.86E+01                         | 1.03E+00                   | 1.30E-02                             | 1.47E-01                        | 3.83E-02                     |
| dimethyl sulfate (C2H6O4S)     | 1     | kg   | 2.81E+00                    | 5.06E-04                | 1.83E-02                       | 2.00E-07                      | 3.31E-04                | 3.91E+01                         | 7.96E-01                   | 2.15E-02                             | 1.28E-01                        | 1.00E-01                     |
| Potassium iodide (KI)          | 1     | kg   | 4.98E+00                    | 6.00E-04                | 7.19E-02                       | 9.17E-07                      | 9.41E-04                | 7.77E+01                         | 4.87E+00                   | 3.55E-02                             | 2.43E-01                        | 1.87E-01                     |
| Potassium iodate (KIO3)        | 1     | kg   | 5.19E+00                    | 6.71E-04                | 8.00E-02                       | 9.64E-07                      | 9.62E-04                | 9.45E+01                         | 5.76E+00                   | 3.65E-02                             | 2.55E-01                        | 2.32E-01                     |
| methanol (CH4O)                | 1     | kg   | 5.07E-01                    | 2.35E-04                | 1.63E-02                       | 1.40E-07                      | 5.15E-05                | 3.36E+01                         | 3.81E-01                   | 2.57E-03                             | 2.23E-02                        | 8.96E-02                     |
| hydrochloric acid (HCl) (30%)  | 1     | kg   | 2.68E+00                    | 1.39E-04                | 1.22E-02                       | 1.20E-06                      | 6.48E-04                | 2.61E+01                         | 1.38E+00                   | 1.86E-02                             | 1.95E-01                        | 5.55E-02                     |
| sulfuric acid (H2SO4)          | 1     | kg   | 4.16E-01                    | 3.50E-05                | 3.17E-03                       | 6.08E-08                      | 5.02E-05                | 7.08E+00                         | -1.50E-01                  | 4.31E-03                             | 2.10E-02                        | 1.90E-02                     |
| chlorobenzene (C6H5Cl)         | 1     | kg   | 3.68E+00                    | 2.30E-03                | 3.94E-02                       | 1.26E-06                      | 7.65E-04                | 7.99E+01                         | 2.78E+00                   | 2.83E-02                             | 2.10E-01                        | 1.93E-01                     |
| sodium methoxide (CH3ONa)      | 1     | kg   | 7.21E-01                    | 7.26E-05                | 4.53E-03                       | 1.27E-07                      | 1.57E-04                | 9.89E+00                         | 4.40E-01                   | 5.07E-03                             | 5.67E-02                        | 2.08E-02                     |
| hydrogen (H2)                  | 1     | kg   | 2.38E+01                    | 1.30E-03                | 1.12E-01                       | 1.60E-05                      | 3.73E-03                | 2.40E+02                         | 1.32E+01                   | 1.67E-01                             | 1.89E+00                        | 4.93E-01                     |
| aniline (C6H7N)                | 1     | kg   | 5.19E+00                    | 8.27E-04                | 4.67E-02                       | 4.41E-07                      | 1.06E-03                | 9.65E+01                         | 4.69E+00                   | 4.34E-02                             | 2.13E-01                        | 2.42E-01                     |
| sodium nitrite (NaNO2)         | 1     | kg   | 4.19E+00                    | 2.76E-04                | 2.06E-02                       | 9.80E-07                      | 1.57E-03                | 4.52E+01                         | 2.33E+00                   | 3.18E-02                             | 2.04E-01                        | 1.02E-01                     |
| sulfur dioxide (SO2)           | 1     | kg   | 9.19E-01                    | 9.77E-05                | 9.59E-03                       | 1.65E-07                      | 1.40E-04                | 2.12E+01                         | -1.43E+00                  | 1.13E-02                             | 9.70E-02                        | 5.39E-02                     |
| coal tar                       | 1     | kg   | 1.08E+00                    | 5.33E-05                | 4.64E-03                       | 3.53E-08                      | 1.38E-04                | 9.84E+00                         | 5.34E-01                   | 7.17E-03                             | 7.40E-02                        | 2.14E-02                     |
| ethylene glycol (C2H6O2)       | 1     | kg   | 1.77E+00                    | 6.28E-04                | 2.32E-02                       | 4.90E-08                      | 2.43E-04                | 5.19E+01                         | 1.62E+00                   | 1.33E-02                             | 1.01E-01                        | 1.28E-01                     |
| magnesium (Mg)                 | 1     | kg   | 3.84E+00                    | 3.32E-03                | 1.73E-01                       | 5.51E-06                      | 9.18E-04                | 3.56E+02                         | 1.82E+01                   | 4.32E-02                             | 3.55E-01                        | 9.37E-01                     |
| bromine (Br2)                  | 1     | kg   | 3.68E+00                    | 6.15E-04                | 4.25E-02                       | 1.08E-06                      | 9.69E-04                | 7.18E+01                         | 4.65E+00                   | 3.09E-02                             | 2.00E-01                        | 1.75E-01                     |
| zinc oxide (ZnO)               | 1     | kg   | 2.32E+00                    | 1.94E-04                | 1.30E-02                       | 1.25E-07                      | 5.22E-04                | 2.70E+01                         | 1.42E+00                   | 1.30E-01                             | 6.41E-02                        | 7.01E-02                     |
| acetic acid (C2H4O2) (98%)     | 1     | kg   | 2.22E+00                    | 1.13E-03                | 2.43E-02                       | 3.19E-07                      | 3.39E-04                | 5.21E+01                         | 1.48E+00                   | 1.60E-02                             | 1.52E-01                        | 1.29E-01                     |
| hydrogen peroxide (H2O2) (50%) | 1     | kg   | 2.53E+00                    | 1.46E-04                | 1.02E-02                       | 1.23E-07                      | 2.56E-04                | 2.14E+01                         | 1.11E+00                   | 1.39E-02                             | 9.00E-02                        | 5.16E-02                     |
| n-Butanol (C4H10O)             | 1     | kg   | 2.22E+00                    | 4.80E-03                | 3.87E-02                       | 2.69E-07                      | 4.31E-04                | 8.43E+01                         | 2.59E+00                   | 2.56E-02                             | 1.67E-01                        | 2.08E-01                     |
| chloroform (CHCl3)             | 1     | kg   | 2.63E+00                    | 3.99E-04                | 1.77E-02                       | 1.25E-03                      | 5.99E-04                | 3.72E+01                         | 3.80E+00                   | 1.80E-02                             | 2.31E-01                        | 8.60E-02                     |
| Indium (In)                    | 1     | kg   | 7.92E+02                    | 2.23E-02                | 2.02E+00                       | 1.23E-05                      | 6.38E-01                | 2.66E+03                         | 1.45E+02                   | 2.93E+01                             | 2.03E+01                        | 1.42E+01                     |
| Tin (Sn)                       | 1     | kg   | 2.22E+01                    | 2.60E-03                | 1.97E-01                       | 1.51E-06                      | 4.10E-03                | 3.34E+02                         | 8.25E+00                   | 2.49E-01                             | 4.24E+00                        | 2.43E+01                     |

|                                 |   |    |          |          |          |          |          |          |          |          |          |          |
|---------------------------------|---|----|----------|----------|----------|----------|----------|----------|----------|----------|----------|----------|
| glass                           | 1 | kg | 4.36E-01 | 6.68E-05 | 5.98E-03 | 7.39E-08 | 9.14E-05 | 1.29E+01 | 7.49E-01 | 9.49E-03 | 4.09E-02 | 3.36E-02 |
| silica sand                     | 1 | kg | 2.77E-02 | 7.14E-06 | 2.22E-04 | 2.37E-09 | 8.96E-06 | 4.43E-01 | 2.97E-02 | 6.70E-04 | 1.65E-03 | 1.01E-03 |
| argon (Ar)                      | 1 | kg | 1.76E+00 | 9.96E-05 | 1.09E-02 | 8.35E-08 | 3.54E-04 | 2.44E+01 | 1.26E+00 | 1.18E-02 | 1.67E-01 | 4.50E-02 |
| oxygen (O2)                     | 1 | kg | 6.68E-01 | 4.22E-05 | 4.60E-03 | 3.17E-08 | 1.15E-04 | 9.70E+00 | 5.36E-01 | 4.08E-03 | 8.04E-02 | 1.90E-02 |
| nitrogen (N2)                   | 1 | kg | 6.46E-01 | 4.09E-05 | 4.45E-03 | 3.07E-08 | 1.11E-04 | 9.39E+00 | 5.18E-01 | 1.20E-03 | 6.21E-02 | 1.82E-02 |
| ethylene vinyl acetate          | 1 | kg | 1.41E+00 | 7.52E-04 | 3.43E-02 | 7.92E-08 | 1.95E-04 | 7.63E+01 | 1.97E+00 | 1.16E-02 | 8.37E-02 | 1.93E-01 |
| aluminium (Al)                  | 1 | kg | 4.43E+01 | 4.54E-03 | 4.44E-02 | 8.87E-07 | 3.79E-03 | 1.47E+02 | 4.99E+00 | 6.67E-02 | 4.01E-01 | 3.76E-01 |
| Ilmenite                        | 1 | kg | 3.43E-02 | 1.28E-05 | 1.14E-03 | 2.54E-08 | 1.24E-05 | 2.58E+00 | 3.27E-02 | 2.57E-04 | 2.84E-03 | 6.68E-03 |
| Iron pellet/powder              | 1 | kg | 1.30E-01 | 2.21E-05 | 9.12E-04 | 1.43E-08 | 2.69E-05 | 1.81E+00 | 9.09E-02 | 1.29E-03 | 3.04E-02 | 5.44E-03 |
| methane (CH4)                   | 1 | kg | 1.28E+00 | 3.58E-04 | 6.56E-03 | 6.94E-08 | 1.18E-02 | 7.12E+01 | 8.14E-01 | 8.50E-01 | 1.09E-01 | 3.00E-02 |
| Gold (Au)                       | 1 | kg | 1.01E+06 | 2.54E+00 | 1.55E+02 | 9.73E-04 | 1.29E+01 | 1.18E+05 | 5.46E+03 | 1.88E+03 | 1.91E+04 | 2.84E+02 |
| soda ash                        | 1 | kg | 1.52E+00 | 1.03E-04 | 6.38E-03 | 7.20E-08 | 4.06E-04 | 1.39E+01 | 7.46E-01 | 1.13E-02 | 5.64E-02 | 3.39E-02 |
| limestone                       | 1 | kg | 1.82E-03 | 1.25E-06 | 1.92E-05 | 3.68E-10 | 9.07E-07 | 4.37E-02 | 2.29E-03 | 4.28E-05 | 6.74E-04 | 1.07E-04 |
| dolomite                        | 1 | kg | 3.81E-02 | 5.38E-06 | 2.64E-04 | 1.96E-09 | 8.92E-06 | 5.41E-01 | 3.26E-02 | 4.34E-04 | 4.34E-03 | 1.12E-03 |
| cullet                          | 1 | kg | 6.40E-02 | 2.31E-06 | 4.31E-05 | 1.02E-09 | 5.11E-06 | 9.43E-02 | 1.09E-02 | 2.32E-04 | 1.28E-03 | 2.19E-04 |
| deionised water                 | 1 | kg | 4.36E-03 | 1.76E-07 | 1.09E-05 | 7.95E-10 | 9.07E-07 | 2.41E-02 | 1.30E-03 | 2.09E-05 | 1.60E-04 | 4.82E-05 |
| chlorine (Cl2)                  | 1 | kg | 1.79E+00 | 9.74E-05 | 8.44E-03 | 1.20E-06 | 2.80E-04 | 1.80E+01 | 9.94E-01 | 1.25E-02 | 1.42E-01 | 3.71E-02 |
| titanium dioxide (TiO2)         | 1 | kg | 2.69E+01 | 6.55E-03 | 4.50E-02 | 1.54E-06 | 1.70E-03 | 9.37E+01 | 6.44E+00 | 7.81E-02 | 5.76E-01 | 2.02E-01 |
| isopropanol (C3H8O)             | 1 | kg | 1.03E+00 | 5.22E-03 | 2.78E-02 | 7.51E-08 | 1.49E-04 | 6.16E+01 | 1.69E+00 | 1.02E-02 | 5.40E-02 | 1.58E-01 |
| acetone (C3H6O)                 | 1 | kg | 1.36E-01 | 2.45E-04 | 3.07E-02 | 1.35E-09 | 5.73E-05 | 6.74E+01 | 2.07E+00 | 4.98E-03 | 2.86E-02 | 1.72E-01 |
| acetic anhydride (C4H6O3)       | 1 | kg | 3.93E+00 | 1.58E-03 | 3.67E-02 | 4.71E-07 | 6.95E-04 | 7.88E+01 | 3.21E+00 | 3.82E-02 | 2.26E-01 | 1.91E-01 |
| methylcyclohexane (C7H14)       | 1 | kg | 2.19E+00 | 2.21E-03 | 4.98E-02 | 1.70E-07 | 5.33E-04 | 1.06E+02 | 3.92E+00 | 4.21E-02 | 1.45E-01 | 2.66E-01 |
| butyl acetate (C6H12O2)         | 1 | kg | 3.55E+00 | 5.68E-03 | 4.23E-02 | 4.16E-07 | 7.01E-04 | 9.20E+01 | 3.11E+00 | 4.01E-02 | 1.95E-01 | 2.25E-01 |
| silver (Ag)                     | 1 | kg | 1.70E+04 | 4.26E-02 | 2.60E+00 | 1.63E-05 | 2.17E-01 | 1.98E+03 | 9.17E+01 | 3.16E+01 | 3.21E+02 | 4.77E+00 |
| adhesive                        | 1 | kg | 4.14E-01 | 1.80E-04 | 1.18E-02 | 2.28E-07 | 1.49E-04 | 2.69E+01 | 3.71E-01 | 1.19E-02 | 2.40E-02 | 6.79E-02 |
| dimethylformamide (C3H7NO)      | 1 | kg | 3.75E+00 | 9.53E-04 | 3.77E-02 | 4.65E-07 | 1.16E-03 | 8.04E+01 | 2.30E+00 | 2.85E-02 | 1.90E-01 | 2.03E-01 |
| PET                             | 1 | kg | 2.83E+00 | 5.25E-04 | 3.46E-02 | 1.31E-07 | 4.79E-04 | 7.62E+01 | 2.59E+00 | 3.15E-02 | 1.39E-01 | 1.88E-01 |
| incineration of average residue | 1 | kg | 7.48E+00 | 3.36E-05 | 1.25E-03 | 1.79E-08 | 1.05E-04 | 2.60E+00 | 3.93E-01 | 1.54E-02 | 4.85E-02 | 6.25E-03 |
| inert material landfill         | 1 | kg | 2.88E-03 | 1.85E-06 | 7.33E-05 | 1.57E-09 | 1.07E-06 | 1.67E-01 | 4.50E-03 | 2.19E-04 | 2.51E-04 | 4.27E-04 |

### 3. Uncertainty sensitivity and Sensitivity analysis

Similar to the uncertainty analysis and sensitivity analyses for the TiO<sub>2</sub> module, those of the ZnO module are shown in Figure S6 and Figure S7, respectively.

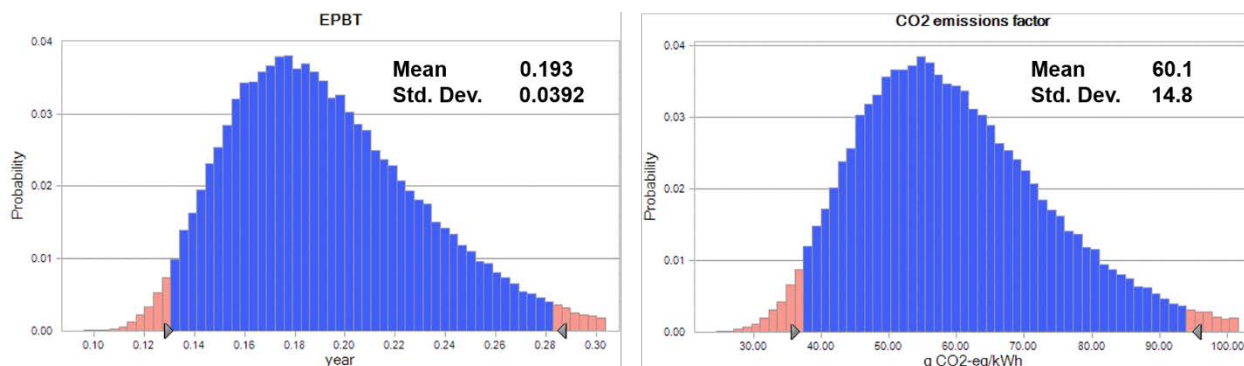

Figure S6. Probability distributions for energy payback time (EPBT) and CO<sub>2</sub> emissions factor of the ZnO Module.

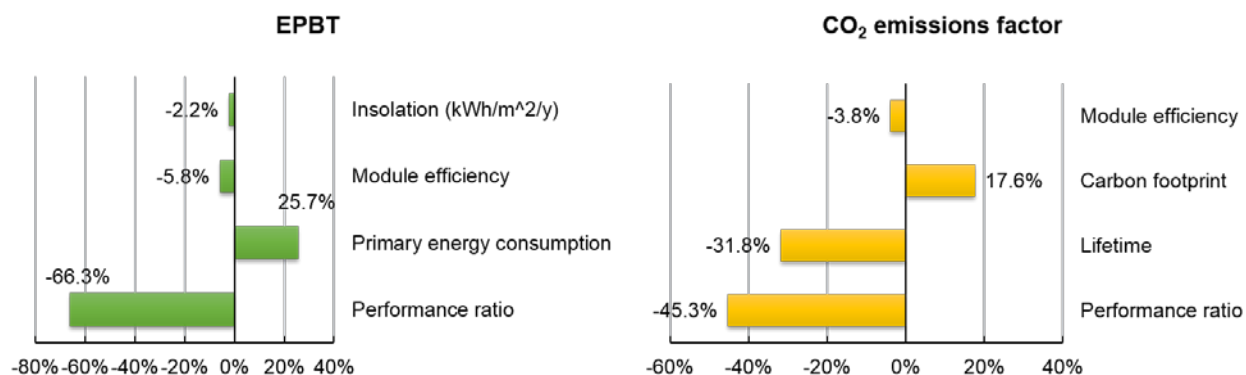

Figure S7. Sensitivity analysis for energy payback time (EPBT) and CO<sub>2</sub> emissions factor of the ZnO Module.

### References

1. Train, R.; Agee, T.; Gywin, A.; Martin, E. *Development Document for Interim Final Effluent Limitations. Guidelines and Proposed New Source Performance Standards for the significant inorganic products*; U.S. Environmental Protection Agency Washington, DC, 1975.
2. Carr, D. S., Lead Compounds. In *Ullmann's Encyclopedia of Industrial Chemistry*, Wiley-VCH Verlag GmbH & Co. KGaA: 2000.

3. Wang, L. K.; Shamma, N. K.; Hung, Y. T., *Biosolids Treatment Processes: Volume 6*. Humana Press: 2007.
4. Archive, R., Preparation of hydriodic acid (HI); <http://www.erowid.org/archive/rhodium/chemistry/hydriodic.html> (Last accessed December 2014).
5. G. S. Hiers, F. D. H., Anisole; <http://www.orgsyn.org/demo.aspx?prep=cv1p0058> (Last accessed December 2014).
6. S. Adimurthy, G. R., P. K. Ghosh, A. V. Bedekar, General procedure for the iodination; <https://www.erowid.org/archive/rhodium/chemistry/aromatic.iodination.iodide-iodate.html> (Last accessed December 2014).
7. Booth, G., Nitro Compounds, Aromatic. In *Ullmann's Encyclopedia of Industrial Chemistry*, Wiley-VCH Verlag GmbH & Co. KGaA: 2000.
8. Coleman, G. H., Phenylhydrazine; <http://www.orgsyn.org/demo.aspx?prep=cv1p0442> (Last accessed December 2014).
9. Jianping Zou, R. Z., Tao Jiang, Shengyan Chen, A method for preparing 2-amino-biphenyl derivative. In Google Patents: 2014.
10. Schmidt, R.; Griesbaum, K.; Behr, A.; Biedenkapp, D.; Voges, H.-W.; Garbe, D.; Paetz, C.; Collin, G.; Mayer, D.; Höke, H., Hydrocarbons. In *Ullmann's Encyclopedia of Industrial Chemistry*, Wiley-VCH Verlag GmbH & Co. KGaA: 2000.
11. Huiwen Shi, Z. B., Bin Shi, Zhenhua Zhang, Method for preparing coarse fluorene and fluorenone by taking wash oil as raw material. In Google Patents: 2012.
12. Yuan, W. Design and development of efficient solid-state dye-sensitized solar cells. Ph.D., Michigan State University, Ann Arbor, 2013.
13. Syrrakou, E.; Papaefthimiou, S.; Yianoulis, P., Environmental assessment of electrochromic glazing production. *Solar Energy Materials and Solar Cells* **2005**, 85, (2), 205-240.
14. Garcia-Valverde, R.; Cherni, J. A.; Urbina, A., Life cycle analysis of organic photovoltaic technologies. *Progress in Photovoltaics* **2010**, 18, (7), 535-558.
15. Kavan, L.; Gratzel, M., Highly Efficient Semiconducting TiO<sub>2</sub> Photoelectrodes Prepared by Aerosol Pyrolysis. *Electrochimica Acta* **1995**, 40, (5), 643-652.
16. Solaronix, Ti-Nanoxide T/SP; <http://shop.solaronix.com/titania-pastes/ti-nanoxide-t-sp.html> (Last accessed December 2014).
17. Liu, D. Y.; Kelly, T. L., Perovskite solar cells with a planar heterojunction structure prepared using room-temperature solution processing techniques. *Nature Photonics* **2014**, 8, (2), 133-138.
18. Supplies, S., SPI Silver Paste Plus(TM); [http://www.2spi.com/catalog/spec\\_prep/plus\\_prop.html](http://www.2spi.com/catalog/spec_prep/plus_prop.html) (Last accessed February, 2015).
19. Irizarry, R.; Yang, H. Process for making silver powder particles with small size crystallites. 2014.
20. Ecoinvent database v3.1; <http://www.ecoinvent.ch/> (Last accessed December 2014).
